# Supplementary material
Source: MDPI journal article supplement (https://www.mdpi.com/2073-4441/14/2/150)
Supplement: s1 [file s1]

Table S1: Coverage rates of different sensor schemes arranged by the proposed method under different hydraulic conditions

| Numbers of sensors | Pipe burst level | Coverage rate |              |              |
|--------------------|------------------|---------------|--------------|--------------|
|                    |                  | Average flow  | Maximum flow | Minimum flow |
| 6                  | 0.2              | 0.5043        | 0.4784       | 0.4181       |
|                    | 0.3              | 0.7672        | 0.6918       | 0.6034       |
|                    | 0.4              | 0.9246        | 0.9009       | 0.8362       |
|                    | 0.5              | 0.9375        | 0.9332       | 0.9138       |
|                    | 0.6              | 0.9397        | 0.9375       | 0.931        |
| 8                  | 0.2              | 0.5366        | 0.5043       | 0.4418       |
|                    | 0.3              | 0.8772        | 0.8276       | 0.7435       |
|                    | 0.4              | 0.9677        | 0.9677       | 0.9418       |
|                    | 0.5              | 0.9741        | 0.9741       | 0.9698       |
|                    | 0.6              | 0.9763        | 0.9741       | 0.972        |
| 10                 | 0.2              | 0.5474        | 0.5216       | 0.4741       |
|                    | 0.3              | 0.8836        | 0.8384       | 0.7608       |
|                    | 0.4              | 0.9677        | 0.9677       | 0.9418       |
|                    | 0.5              | 0.9741        | 0.9741       | 0.9698       |
|                    | 0.6              | 0.9763        | 0.9741       | 0.972        |
| 12                 | 0.2              | 0.5517        | 0.5259       | 0.4784       |
|                    | 0.3              | 0.8944        | 0.8491       | 0.7629       |
|                    | 0.4              | 0.9677        | 0.9677       | 0.9591       |
|                    | 0.5              | 0.9741        | 0.9741       | 0.9698       |
|                    | 0.6              | 0.9763        | 0.9741       | 0.972        |

Table S2: Coverage rates of different sensor schemes arranged by the K-means method under different hydraulic conditions

| Numbers of sensors | Pipe burst level | Coverage rate |              |              |
|--------------------|------------------|---------------|--------------|--------------|
|                    |                  | Average flow  | Maximum flow | Minimum flow |
| 6                  | 0.2              | 0.5043        | 0.4784       | 0.4181       |
|                    | 0.3              | 0.7672        | 0.6918       | 0.6034       |
|                    | 0.4              | 0.9246        | 0.9009       | 0.8362       |
|                    | 0.5              | 0.9375        | 0.9332       | 0.9138       |
|                    | 0.6              | 0.9397        | 0.9375       | 0.931        |
| 8                  | 0.2              | 0.5366        | 0.5043       | 0.4418       |
|                    | 0.3              | 0.8772        | 0.8276       | 0.7435       |
|                    | 0.4              | 0.9677        | 0.9677       | 0.9418       |
|                    | 0.5              | 0.9741        | 0.9741       | 0.9698       |
|                    | 0.6              | 0.9763        | 0.9741       | 0.972        |
| 10                 | 0.2              | 0.5474        | 0.5216       | 0.4741       |
|                    | 0.3              | 0.8836        | 0.8384       | 0.7608       |
|                    | 0.4              | 0.9677        | 0.9677       | 0.9418       |
|                    | 0.5              | 0.9741        | 0.9741       | 0.9698       |
|                    | 0.6              | 0.9763        | 0.9741       | 0.972        |
| 12                 | 0.2              | 0.5517        | 0.5259       | 0.4784       |
|                    | 0.3              | 0.8944        | 0.8491       | 0.7629       |
|                    | 0.4              | 0.9677        | 0.9677       | 0.9591       |
|                    | 0.5              | 0.9741        | 0.9741       | 0.9698       |
|                    | 0.6              | 0.9763        | 0.9741       | 0.972        |
